# Supplementary material for: Uncovering chemical signatures of salinity gradients through compositional analysis of protein sequences
Source: Copernicus journal article supplement (doi:10.5194/bg-2020-146), 2020-05-15
Supplement: Supplementary file 2 [file bg-2020-146-supplement.zip]

Figure S1: Analysis of bacterial transcriptomics data for hyperosmotic stress

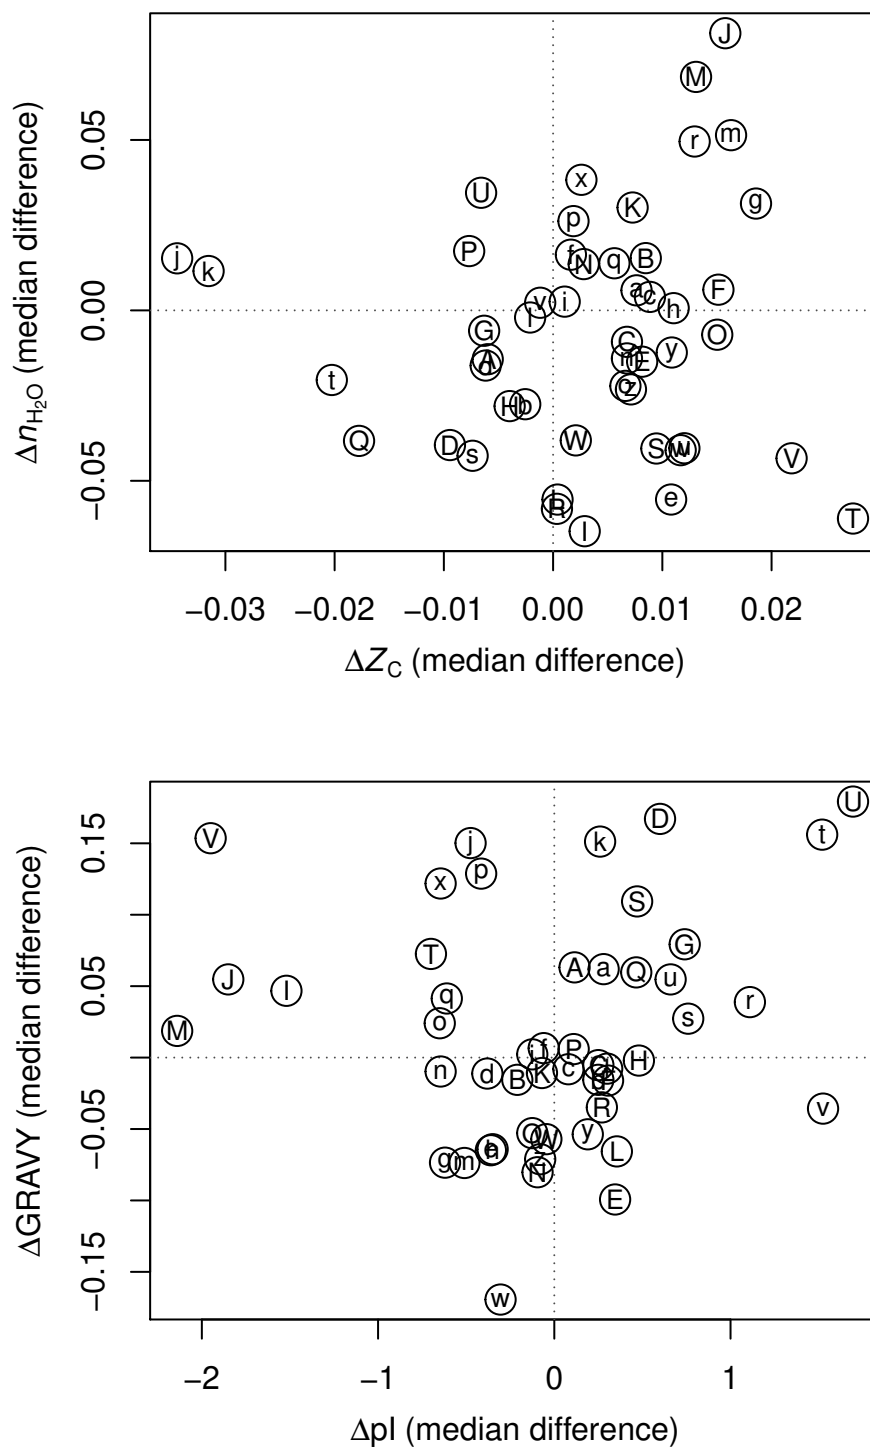

| Set | Reference | Description                                                                      | Down | Up  |
|-----|-----------|----------------------------------------------------------------------------------|------|-----|
| a   | KSA+02    | <i>Synechocystis</i> sp. PCC 6803 in 0.5 M NaCl vs control                       | 36   | 62  |
| b   | KSA+02    | <i>Synechocystis</i> sp. PCC 6803 in 0.5 M sorbitol vs control                   | 32   | 45  |
| c   | WJ02      | <i>Escherichia coli</i> in 0.4 M NaCl vs control                                 | 102  | 41  |
| d   | HZP+05    | <i>Yersinia pestis</i> in 0.5 M NaCl vs control                                  | 13   | 103 |
| e   | HZP+05    | <i>Yersinia pestis</i> in 0.5 M sorbitol vs control                              | 40   | 103 |
| f   | LGW+05    | <i>Shewanella oneidensis</i> MR-1 in 0.5 vs 0.1 M NaCl                           | 563  | 541 |
| g   | SLA+05    | <i>Synechocystis</i> sp. PCC 6803 in 0.5 M sorbitol vs control                   | 27   | 53  |
| h   | GCP08     | <i>Escherichia coli</i> in 0.5 M vs 0 M NaCl at 30 deg C                         | 307  | 40  |
| i   | GCP08     | <i>Escherichia coli</i> in 0.5 M vs 0 M NaCl at 43 deg C                         | 89   | 144 |
| j   | SBB+09    | <i>Escherichia coli</i> in 2.7 Os/kg NaCl vs control                             | 35   | 26  |
| k   | SBB+09    | <i>Escherichia coli</i> in 2.7 Os/kg sucrose vs control                          | 28   | 37  |
| l   | HMO+10    | <i>Bacillus subtilis</i> in 6% w/v NaCl vs control                               | 417  | 459 |
| m   | BBWB12    | <i>Listeria monocytogenes</i> strain H7858 in 6% NaCl at 2.5% lag-phase duration | 18   | 55  |
| n   | BBWB12    | <i>Listeria monocytogenes</i> strain H7858 in 6% NaCl at 5% lag-phase duration   | 85   | 134 |
| o   | BBWB12    | <i>Listeria monocytogenes</i> strain H7858 in 6% NaCl at 10% lag-phase duration  | 136  | 156 |
| p   | BBWB12    | <i>Listeria monocytogenes</i> strain H7858 in 6% NaCl at 20% lag-phase duration  | 58   | 44  |
| q   | LB12      | <i>Synechococcus</i> sp. strain PCC 7002 in 1.5 M NaCl vs control                | 311  | 646 |
| r   | QHT+13    | <i>Synechocystis</i> sp. PCC 6803 Gene in 4% w/v vs 0% added NaCl for 24 h       | 50   | 48  |
| s   | QHT+13    | <i>Synechocystis</i> sp. PCC 6803 Gene in 4% w/v vs 0% added NaCl for 48 h       | 50   | 50  |
| t   | QHT+13    | <i>Synechocystis</i> sp. PCC 6803 Gene in 4% w/v vs 0% added NaCl for 72 h       | 50   | 49  |
| u   | WGB+13    | <i>Escherichia coli</i> in 0.3 M NaCl vs control                                 | 525  | 524 |
| v   | WGB+13    | <i>Escherichia coli</i> in 0.6 M urea vs control                                 | 337  | 370 |
| w   | ADW+14    | <i>Bifidobacterium longum</i> BBM68 Gene with vs without 0.75 g/l ox bile        | 160  | 76  |
| x   | KKG+14    | <i>Escherichia coli</i> Gene in NaCl (0.967 aw) vs control for 30 min            | 15   | 164 |
| y   | KKG+14    | <i>Escherichia coli</i> Gene in NaCl (0.967 aw) vs control for 80 min            | 409  | 727 |
| z   | KKG+14    | <i>Escherichia coli</i> Gene in NaCl (0.967 aw) vs control for 310 min           | 319  | 571 |
| A   | KSM+14    | <i>Bacillus subtilis</i> in 1.2 M NaCl vs control                                | 687  | 642 |
| B   | KSM+14    | <i>Bacillus subtilis</i> with vs without glycine betaine in 1.2 M NaCl           | 311  | 559 |
| C   | MGM+14    | <i>Escherichia coli</i> in 3.5 vs 2% NaCl (with glycine betaine)                 | 169  | 64  |
| D   | MGM+14    | <i>Escherichia coli</i> in 4.5 vs 2% NaCl (with glycine betaine)                 | 740  | 579 |
| E   | MGM+14    | <i>Escherichia coli</i> in 5 vs 2% NaCl (with glycine betaine)                   | 43   | 82  |
| F   | MGM+14    | <i>Escherichia coli</i> in 5.5 vs 2% NaCl (with glycine betaine)                 | 79   | 84  |
| G   | SLM+14    | <i>Enterococcus faecalis</i> in 6.5% NaCl vs control at 5 min                    | 113  | 69  |
| H   | SLM+14    | <i>Enterococcus faecalis</i> in 6.5% NaCl vs control at 30 min                   | 125  | 175 |
| I   | SLM+14    | <i>Enterococcus faecalis</i> in 6.5% NaCl vs control at 60 min                   | 170  | 172 |
| J   | FRH+15    | <i>Salmonella enterica</i> in NaCl vs control for 1h h                           | 113  | 60  |
| K   | FRH+15    | <i>Salmonella enterica</i> in NaCl vs control for 6h h                           | 255  | 149 |
| L   | FRH+15    | <i>Salmonella enterica</i> in NaCl vs control for 24h h                          | 163  | 60  |
| M   | FRH+15    | <i>Salmonella enterica</i> in KCl vs control for 1h h                            | 92   | 45  |
| N   | FRH+15    | <i>Salmonella enterica</i> in KCl vs control for 6h h                            | 349  | 264 |
| O   | FRH+15    | <i>Salmonella enterica</i> in KCl vs control for 24h h                           | 403  | 182 |
| P   | FRH+15    | <i>Salmonella enterica</i> in glycerol vs control for 1h h                       | 300  | 333 |
| Q   | FRH+15    | <i>Salmonella enterica</i> in glycerol vs control for 6h h                       | 261  | 132 |
| R   | FRH+15    | <i>Salmonella enterica</i> in glycerol vs control for 24h h                      | 164  | 67  |
| S   | KLB+15    | <i>Caulobacter crescentus</i> Gene in 40/50 mM NaCl vs M2 minimal salts medium   | 209  | 142 |
| T   | KLB+15    | <i>Caulobacter crescentus</i> Gene in 200 mM sucrose vs M2 minimal salts medium  | 105  | 96  |
| U   | HLL17     | <i>Methylocystis</i> sp. strain SC2 in 0.75% NaCl vs control at 45min            | 105  | 46  |
| V   | HLL17     | <i>Methylocystis</i> sp. strain SC2 in 0.75% NaCl vs control at 14h              | 22   | 75  |
| W   | MWZ+18    | <i>Lactobacillus paracasei</i> L9 with vs without 0.13% ox bile                  | 42   | 56  |

**a. b.** Tables 1–2 of Kanesaki et al. (2002). **c.** Table 1 of Weber and Jung (2002). **d. e.** Table 3 of Han et al. (2005). **f.** Table 1S of Liu et al. (2005). **g.** Tables 2–3 of Shapiguzov et al. (2005). **h. i.** [Dataset.txt](#) of Gunasekera et al. (2008). **j. k.** Table 3 of Shabala et al. (2009). **l.** Table S2 (sheet “S2\_Table\_3”) of Hahne et al. (2010). **m. n. o. p.** Table S5 of Bergholz et al. (2012), filtered to include genes with  $\log_2$  fold change  $> 1$  or  $< -1$ . **q.** Table S2 of Ludwig and Bryant (2012), filtered to include genes with  $p$ -value  $< 0.05$  and fold change  $> 2$  or  $< 0.5$ . **r. s. t.** Supplementary Tables S2A–S2F of Qiao et al. (2013). **u. v.** [Dataset.txt](#) of Withman et al. (2013), filtered to include proteins with log fold change (column “N vs K Wmean [M]” for NaCl and “U vs K Wmean [M]” for urea)  $> 1$  or  $< 1$  and  $p$ -value less than 0.05. **w.** Table S2 of An et al. (2014) **x. y. z.** Table S2 of Kocharunchitt et al. (2014) **A. B.** Tables S5–S6 of Kohlstedt et al. (2014). **C. D. E. F.** Supplemental Table S1 of Metris et al. (2014), filtered to include genes with differences of Normalized  $\ln(\text{cDNA/gDNA}) > 1$  or  $< 1$  between 2 % and higher NaCl concentration. **G. H. I.** Table S2 of Solheim et al. (2014). **J. K. L. M. N. O. P. Q. R.** Tables S1–S3 of Finn et al. (2015). **S. T.** Table S2 of Kohler et al. (2015). **U. V.** Tables S5–S8 of Han et al. (2017). **W.** Table S6 of Ma et al. (2018).

## References

- An, H., Douillard, F. P., Wang, G., Zhai, Z., Yang, J., Song, S., Cui, J., Ren, F., Luo, Y., Zhang, B. and Hao, Y.: Integrated transcriptomic and proteomic analysis of the bile stress response in a centenarian-originated probiotic *Bifidobacterium longum* BBMN68, *Molecular & Cellular Proteomics*, 13(10), 2558–2572, doi:[10.1074/mcp.M114.039156](#), 2014.
- Bergholz, T. M., Bowen, B., Wiedmann, M. and Boor, K. J.: *Listeria monocytogenes* shows temperature-dependent and -independent responses to salt stress, including responses that induce cross-protection against other stresses, *Applied and Environmental Microbiology*, 78(8), 2602–2612, doi:[10.1128/AEM.07658-11](#), 2012.
- Finn, S., Rogers, L., Händler, K., McClure, P., Amézquita, A., Hinton, J. C. D. and Fanning, S.: Exposure of *Salmonella enterica* serovar Typhimurium to three humectants used in the food industry induces different osmoadaptation systems, *Applied and Environmental Microbiology*, 81(19), 6800–6811, doi:[10.1128/AEM.01379-15](#), 2015.
- Gunasekera, T. S., Csonka, L. N. and Paliy, O.: Genome-wide transcriptional responses of *Escherichia coli* K-12 to continuous osmotic and heat stresses, *Journal of Bacteriology*, 190(10), 3712–3720, doi:[10.1128/JB.01990-07](#), 2008.
- Hahne, H., Mäder, U., Otto, A., Bonn, F., Steil, L., Bremer, E., Hecker, M. and Becher, D.: A comprehensive proteomics and transcriptomics analysis of *Bacillus subtilis* salt stress adaptation, *Journal of Bacteriology*, 192(3), 870–882, doi:[10.1128/JB.01106-09](#), 2010.
- Han, D., Link, H. and Liesack, W.: Response of *Methylocystis* sp. Strain SC2 to salt stress: Physiology, global transcriptome, and amino acid profiles, *Applied and Environmental Microbiology*, 83(20), e00866–17, doi:[10.1128/AEM.00866-17](#), 2017.
- Han, Y., Zhou, D., Pang, X., Zhang, L., Song, Y., Tong, Z., Bao, J., Dai, E., Wang, J., Guo, Z., Zhai, J., Du, Z., Wang, X., Wang, J., Huang, P. and Yang, R.: Comparative transcriptome analysis of *Yersinia pestis* in response to hyperosmotic and high-salinity stress, *Research in Microbiology*, 156(3), 403–415, doi:[10.1016/j.resmic.2004.10.004](#), 2005.
- Kanesaki, Y., Suzuki, I., Allakhverdiev, S. I., Mikami, K. and Murata, N.: Salt stress and hyperosmotic stress regulate the expression of different sets of genes in *Synechocystis* sp. PCC 6803, *Biochemical and Biophysical Research Communications*, 290(1), 339–348, doi:[10.1006/bbrc.2001.6201](#), 2002.
- Kocharunchitt, C., King, T., Gobius, K., Bowman, J. P. and Ross, T.: Global genome response of *Escherichia coli* O157:H7 Sakai during dynamic changes in growth kinetics induced by an abrupt downshift in water activity, *PLoS One*, 9(3), 1–13, doi:[10.1371/journal.pone.0090422](#), 2014.
- Kohler, C., Lourenço, R. F., Bernhardt, J., Albrecht, D., Schüler, J., Hecker, M. and Gomes, S. L.: A comprehensive genomic, transcriptomic and proteomic analysis of a hyperosmotic stress sensitive  $\alpha$ -proteobacterium, *BMC Microbiology*, 15(1), 1–15, doi:[10.1186/s12866-015-0404-x](#), 2015.
- Kohlstedt, M., Sappa, P. K., Meyer, H., Maaß, S., Zapras, A., Hoffmann, T., Becker, J., Steil, L., Hecker, M., Dijk, J. M. van, Lalk, M., Mäder, U., Stülke, J., Bremer, E., Völker, U. and Wittmann, C.: Adaptation of *Bacillus subtilis* carbon core metabolism to simultaneous nutrient limitation and osmotic challenge: A multi-omics perspective, *Environmental Microbiology*, 16(6), 1898–1917, doi:[10.1111/1462-2920.12438](#), 2014.

- Liu, Y., Gao, W., Wang, Y., Wu, L., Liu, X., Yan, T., Alm, E., Arkin, A., Thompson, D. K., Fields, M. W. and Zhou, J.: Transcriptome analysis of *Shewanella oneidensis* MR-1 in response to elevated salt conditions, *Journal of Bacteriology*, 187(7), 2501–2507, doi:[10.1128/JB.187.7.2501-2507.2005](https://doi.org/10.1128/JB.187.7.2501-2507.2005), 2005.
- Ludwig, M. and Bryant, D.: *Synechococcus* sp. Strain PCC 7002 transcriptome: Acclimation to temperature, salinity, oxidative stress, and mixotrophic growth conditions, *Frontiers in Microbiology*, 3, 354, doi:[10.3389/fmicb.2012.00354](https://doi.org/10.3389/fmicb.2012.00354), 2012.
- Ma, X., Wang, G., Zhai, Z., Zhou, P. and Hao, Y.: Global transcriptomic analysis and function identification of malolactic enzyme pathway of *Lactobacillus paracasei* L9 in response to bile stress, *Frontiers in Microbiology*, 9, 1978, doi:[10.3389/fmicb.2018.01978](https://doi.org/10.3389/fmicb.2018.01978), 2018.
- Metris, A., George, S. M., Mulholland, F., Carter, A. T. and Baranyi, J.: Metabolic shift of *Escherichia coli* under salt stress in the presence of glycine betaine, *Applied and Environmental Microbiology*, 80(15), 4745–4756, doi:[10.1128/AEM.00599-14](https://doi.org/10.1128/AEM.00599-14), 2014.
- Qiao, J., Huang, S., Te, R., Wang, J., Chen, L. and Zhang, W.: Integrated proteomic and transcriptomic analysis reveals novel genes and regulatory mechanisms involved in salt stress responses in *Synechocystis* sp. PCC 6803, *Applied Microbiology and Biotechnology*, 97(18), 8253–8264, doi:[10.1007/s00253-013-5139-8](https://doi.org/10.1007/s00253-013-5139-8), 2013.
- Shabala, L., Bowman, J., Brown, J., Ross, T., McMeekin, T. and Shabala, S.: Ion transport and osmotic adjustment in *Escherichia coli* in response to ionic and non-ionic osmotica, *Environmental Microbiology*, 11(1), 137–148, doi:[10.1111/j.1462-2920.2008.01748.x](https://doi.org/10.1111/j.1462-2920.2008.01748.x), 2009.
- Shapiguzov, A., Lyukevich, A. A., Allakhverdiev, S. I., Sergeyenkov, T. V., Suzuki, I., Murata, N. and Los, D. A.: Osmotic shrinkage of cells of *Synechocystis* sp. PCC 6803 by water efflux via aquaporins regulates osmostress-inducible gene expression, *Microbiology*, 151(2), 447–455, doi:[10.1099/mic.0.27530-0](https://doi.org/10.1099/mic.0.27530-0), 2005.
- Solheim, M., La Rosa, S. L., Mathisen, T., Snipen, L. G., Nes, I. F. and Brede, D. A.: Transcriptomic and functional analysis of NaCl-induced stress in *Enterococcus faecalis*, *PLoS One*, 9(4), 1–13, doi:[10.1371/journal.pone.0094571](https://doi.org/10.1371/journal.pone.0094571), 2014.
- Weber, A. and Jung, K.: Profiling early osmostress-dependent gene expression in *Escherichia coli* using DNA microarrays, *Journal of Bacteriology*, 184(19), 5502–5507, doi:[10.1128/JB.184.19.5502-5507.2002](https://doi.org/10.1128/JB.184.19.5502-5507.2002), 2002.
- Withman, B., Gunasekera, T. S., Beesetty, P., Agans, R. and Paliy, O.: Transcriptional responses of uropathogenic *Escherichia coli* to increased environmental osmolality caused by salt or urea, *Infection and Immunity*, 81(1), 80–89, doi:[10.1128/IAI.01049-12](https://doi.org/10.1128/IAI.01049-12), 2013.
