# Supplementary material for: Uncovering chemical signatures of salinity gradients through compositional analysis of protein sequences
Source: Copernicus journal article supplement (doi:10.5194/bg-2020-146), 2020-05-15
Supplement: Supplementary file 2 [file Table_S2.xlsx]

## Sheet: Table S2 - Redox gradients
Uncovering chemical signatures of salinity gradients through compositional analysis of protein sequences
Table S2: Details of metagenomic data for redox gradients analyzed in this study.
					available	used	cleaned	coding	average	subsampled
study name (a)	database (b)	sample name (c)	sample description (d)	ID (e)	reads (f)	reads (g)	reads (h)	reads (i)	protein length (j)	proteins (k)
Bison_Pool	IMG	N	Bison Pool #1 050719N BXBC	2009439003	40864	40864		26497	199.13	251
Bison_Pool	IMG	S	Bison Pool #4 050719S BXAW	2009439000	51132	51132		36019	184.346	271
Bison_Pool	IMG	R	Bison Pool #3 050719R BXAS	2010170001	43764	43764		33045	195.484	256
Bison_Pool	IMG	Q	Bison Pool #2 050719Q BXBH	2010170002	84577	84577		68101	191.805	261
Bison_Pool	IMG	P	Bison Pool #5 050719P FGGH	2010170003	74755	74755		60103	189.4	264
Diffuse_Vents	SRA	Ginger_Castle	FS848 (Ginger Castle, Von Damm)	ERX947644	4000000	768006	689616	617995	34.456	1451
Diffuse_Vents	SRA	Shrimp_Gulley_2	FS856 (Shrimp Gulley 2, Piccard)	ERX947703	4000000	773268	684107	624848	34.456	1451
Diffuse_Vents	SRA	Marker_33	FS917_Marker33_DNA	ERX2080779	26174287	602031	557770	519588	47.563	1051
Diffuse_Vents	SRA	Marker_113	FS915_Marker113_DNA	ERX2080783	29169063	609089	565146	529763	47.591	1051
Diffuse_Vents	SRA	Anemone	FS914_Anemone_DNA	ERX2080781	20038786	605857	562454	534042	47.652	1049
Diffuse_Vents	SRA	Plume	AnemonePlume_2015_DNA	ERX2080787	25971522	610329	567622	523497	47.426	1054
Diffuse_Vents	SRA	Background	Background_1500m_2015_DNA	ERX2080789	20534909	620412	553293	486566	47.519	1052
Guerrero_Negro	IMG	01	0-1 mm depth into microbial mat	2004247000	13249	13249		13264	165.572	302
Guerrero_Negro	IMG	02	1-2mm depth into microbial mat	2004247001	12064	12064		12094	158.843	315
Guerrero_Negro	IMG	03	2-3 mm depth into microbial mat	2004247002	13260	13260		13303	162.295	308
Guerrero_Negro	IMG	04	3-4 mm depth into microbial mat	2004247003	13240	13240		13290	161.937	309
Guerrero_Negro	IMG	05	4-5 mm depth into microbial mat	2004247004	15984	15984		16008	162.036	309
Guerrero_Negro	IMG	06	5-6 mm depth into microbial mat	2004247005	13357	13357		13391	166.724	300
Guerrero_Negro	IMG	07	6-10 mm depth into microbial mat	2004247006	15930	15930		15981	163.99	305
Guerrero_Negro	IMG	08	10-22 mm depth into microbial mat	2004247007	13112	13112		13146	160.931	311
Guerrero_Negro	IMG	09	22-34 mm depth into microbial mat	2004247008	13714	13714		13752	163.718	305
Guerrero_Negro	IMG	10	34-49 mm depth into microbial mat	2004247009	12012	12012		12039	158.857	315
(a) Study name used in this study.
(b) Sequence database.
(c) Sample name used in this study.
(d) Site description from the database or other publications.
(e) SRA accession or IMG ID.
(f) Total number of reads available in the database.
NOTE: for IMG, these are assembled contigs, not sequencing reads
(g) Number of reads used for analysis in this study.
(h) Number of reads after adapter trimming, length filtering, and dereplication (not applied to IMG data).
(i) Number of coding reads identified by FragGeneScan.
Because of partial predicted gene sequences, this can be greater than the number of input reads.
(j) Average length of the predicted proteins.
(k) Number of proteins subsampled to calculate amino acid compositions for an average of 50000 amino acids.
